# Supplementary material for: Macular Pigment and Open-Angle Glaucoma in the Elderly: The Montrachet Population-Based Study
Source: MDPI journal article supplement (doi:10.3390/jcm11071830), 2022-03-25
Supplement: s1 [file s1]

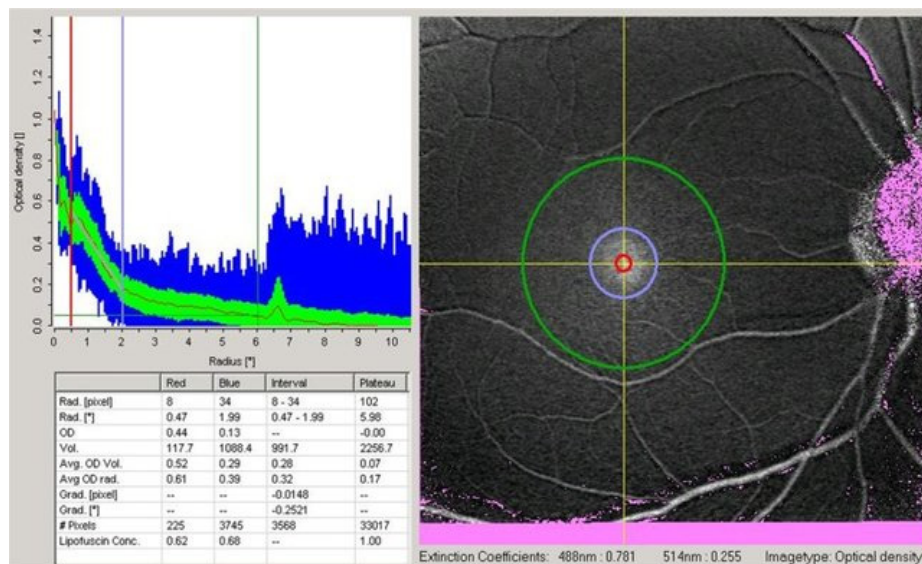

Figure S1. A digital subtraction image with intensity corresponding to MPOD (right) and their measurements plotted from center to periphery of fovea corresponding to the mean MPOD at each eccentricity (left).
